# Supplementary material for: Strategies to enable microsized alloy anodes for high-energy and long-life alkali-ion batteries
Source: Royal Society of Chemistry journal article supplement (doi:10.1039/d3im00126a), 2024-01-01
Supplement: d3im00126a1.pdf [file d3im00126a1.pdf]

## Supporting Information

### **Strategies to enable micro-sized alloy anodes for high-energy and long-life alkali-ion batteries**

Amine Daali <sup>a,b</sup>, Rachid Amine <sup>c</sup>, Wilkistar Otieno <sup>b</sup>, Gui-Liang Xu <sup>\*a</sup> and Khalil Amine <sup>\*a</sup>

<sup>a</sup> *Chemical Sciences and Engineering Division, Argonne National Laboratory, Lemont IL 60439, USA. Email: [xug@anl.gov](mailto:xug@anl.gov) and [amine@anl.gov](mailto:amine@anl.gov).*

<sup>b</sup> *Department of Industrial and Manufacturing Engineering, College of Engineering and Applied Science, University of Wisconsin-Milwaukee, Milwaukee, WI 53211, USA.*

<sup>c</sup> *Materials Science Division, Argonne National Laboratory, Lemont, IL 60439, USA*

**Table 1: Summary of different alloy anodes for LIBs**

| Anodes Materials                                                          | 1 <sup>st</sup> Discharge Capacity (mAh/g) [Current density] | ICE   | Retention rate @ cycle no. | Fast Charging (mAh.g <sup>-1</sup> @ A.g <sup>-1</sup> ) | Synthesis method                                                    | Ref. |
|---------------------------------------------------------------------------|--------------------------------------------------------------|-------|----------------------------|----------------------------------------------------------|---------------------------------------------------------------------|------|
| Nano-porous-Si                                                            | 2600 [0.06 A/g]                                              | 86%   | 62% @ 60 cycles.           | -                                                        | HCl etching                                                         | 1    |
| Microparticle-Si                                                          | 3100 [0.1 A/g]                                               | 85.1% | 40% @ 360 cycles.          | 1183 @ 1                                                 | Magnesiothermic reduction                                           | 2    |
| Micro-sized bulk Porous Si                                                | 2222 [50 mA/g]                                               | 88.1% | 63% @ 100 cycles.          | 558 @ 5                                                  | Ball milling and acid etching                                       | 3    |
| Prickle-like Si@C                                                         | 2300 [0.4 A/g]                                               | 87.5% | 65% @ 100 cycles.          | 1400 @ 4                                                 | metal-assisted chemical etching and chemical vapor deposition (CVD) | 4    |
| Micro-size Si-C composite                                                 | 2004 [0.4 A/g]                                               | 77.2% | 97.8% @ 50 cycles.         | 700 @ 12.8                                               | Etching and Carbon filling                                          | 5    |
| Hierarchical micro/nanostructures Black Phosphorus Carbon composite (BPC) | 2775.2 [0.52 A/g]                                            | 91%   | 87% @ 100 cycles           | 1637 @ 6.24                                              | High Energy Ball Milling (HEBM)                                     | 6    |
| Cross-linked BP-CNT                                                       | 2000 [0.52 A/g]                                              | 70%   | 87.5% @ 400 cycles         | 1098 @ 11.7                                              | HEBM                                                                | 7    |
| Red P/CNT                                                                 | 2870 [0.11 A/g]                                              | 74.3% | 46% @ 50 cycles            | 816.6 @ 1.1                                              | Planetary ball milling                                              | 8    |
| Red P-Graphene                                                            | 2517 [130 mA/g]                                              | 84%   | 74% @ 200 cycles           | 1100 @ 7.8                                               | HEBM                                                                | 9    |
| Fibrous Red P                                                             | 2500 [0.2 A/g]                                               | 81%   | 80% @ 80 cycles            | 1316 @ 2                                                 | chemical vapor Transport (CVT)                                      | 10   |
| Nano-Sn/C composite                                                       | 1029 [0.2 A/g]                                               | 69%   | 98% @ 130 cycles           | 600 @ 15.12                                              | Aerosol spray pyrolysis                                             | 11   |
| Sn@C yolk-shell                                                           | 1414 [0.2 A/g]                                               | 69%   | 44% @ 800 cycles           | -                                                        | CVD                                                                 | 12   |

|                                                                                   |                    |     |                       |             |                    |    |
|-----------------------------------------------------------------------------------|--------------------|-----|-----------------------|-------------|--------------------|----|
| Micro-size porous Sn                                                              | 818<br>[0.2 A/g]   | 65% | 37% @ 10<br>cycles    | -           | Dealloying         | 13 |
| Double-shelled hollow Carbon spheres-Sn                                           | 2267<br>[0.1 A/g]  | 62% | 77.8% @<br>130 cycles | 430 @ 5     | Chemical etching   | 14 |
| Graphene networks anchored with Sn@graphene                                       | 1803<br>[0.2 A/g]  | 69% | 87.5% @<br>100 cycles | 459 @ 5     | CVD                | 15 |
| Hierarchical micro/nanostructures Silicon Black Phosphorus Carbon composite (SPC) | 2140<br>[0.68 A/g] | 84% | 95% @ 120<br>cycles   | 1000 @ 15.3 | HEBM               | 16 |
| 2D SiP Flake                                                                      | 1650<br>[0.2 A/g]  | 87% | 53% @ 10<br>cycles    | 400 @ 2     | Exfoliation method | 17 |
| 3D micro-Sn-Sb-Co alloy                                                           | 816<br>[0.13 A/g]  | 83% | 90% @ 100<br>cycles   | 500 @ 16    | Electrodeposition  | 18 |
| SiP <sub>2</sub> /C0/0/00 0:00:00 AM                                              | 1999<br>[0.1 A/g]  | 83% | 45% @ 100<br>cycles   | 800 @ 3.3   | HEBM               | 19 |
| Micro-Sn-Ge flake like ribbons                                                    | 1242<br>[0.14 A/g] | 85% | 94% @ 60<br>cycles    | 500 @ 7.15  | Melt spinning      | 20 |

**Table 2: Summary of different alloy anodes for SIBs**

| Anodes Materials  | 1 <sup>st</sup> Discharge Capacity (mAh/g) [Current density] | ICE   | Retention rate @ cycle no. | Fast Charging (mAh.g <sup>-1</sup> @ A.g <sup>-1</sup> ) | Synthesis method  | Ref. |
|-------------------|--------------------------------------------------------------|-------|----------------------------|----------------------------------------------------------|-------------------|------|
| Si nanoparticles  | 1027<br>[20 mA/g]                                            | 26%   | 91% @ 100<br>cycles        | 90 @ 0.5                                                 | CVD               | 21   |
| Micro-Si-graphite | 650<br>[0.1 A/g]                                             | 54.4% | 79% @ 100<br>cycles        | 170 @ 1                                                  | Grinding          | 22   |
| Amorphous Si      | 420<br>[36 mA/g]                                             | 60%   | 56% @ 100<br>cycles        | 143 @ 0.725                                              | Mechanical fusion | 23   |

|                                                                                 |                     |       |                        |             |                                                  |    |
|---------------------------------------------------------------------------------|---------------------|-------|------------------------|-------------|--------------------------------------------------|----|
| c-Si/C hybrid                                                                   | 813.7<br>[50 mA/g]  | 53.8% | 100.3% @<br>200 cycles | 269 @ 5     | Electrospinning /<br>etching                     | 24 |
| Multilevel Gradient-Ordered Si                                                  | 950<br>[50 mA/g]    | -     | 40 % @ 20<br>cycles    | 108 @ 1     | Electrochemical<br>reconstruction                | 25 |
| Hierarchical micro/nanostructures<br>Black Phosphorus Carbon composite<br>(BPC) | 2206<br>[0.416 A/g] | 91.1% | 90% @ 50<br>cycles     | 982 @ 3     | HEBM                                             | 26 |
| Hierarchical micro/nanostructures<br>Red Phosphorus Carbon composite<br>(RPC)   | 2300<br>[0.416 A/g] | 87.8% | 77% @ 50<br>cycles     | -           | HEBM                                             | 26 |
| Red P / SWCNT                                                                   | 985<br>[50mA/g]     | 68%   | 80% @ 2000<br>cycles   | 300 @ 2     | Vaporization-<br>Condensation method             | 27 |
| BP/AB Composite                                                                 | 2125<br>[125 mA/g]  | 76%   | 91% @ 23<br>cycles     | 500 @ 25    | HEBM                                             | 28 |
| Sandwiched BP/Graphene                                                          | 3050<br>[50 mA/g]   | 80%   | 85% @ 100<br>cycles    | 645 @ 26    | Liquid-phase<br>exfoliation                      | 29 |
| Porous nano-Sn                                                                  | 550<br>[40 mA/g]    | 90.9% | 55% @ 95<br>cycles     | 300 @ 0.2   | Dealloying                                       | 30 |
| 3D Porous Sn                                                                    | 850<br>[0.2 A/g]    | 96%   | 85% @ 400<br>cycles    | 700 @ 6.5   | Replacement reaction                             | 31 |
| Microsized Sn (Glyme)                                                           | 920<br>[0.25 A/g]   | 92%   | 90 % @ 100<br>cycles   | 622 @ 1.69  | HEBM                                             | 32 |
| Microsized Sn (Diglyme)                                                         | 900<br>[0.085 A/g]  | 84%   | 80% @ 300<br>cycles    | 300 @ 1.6   | HEBM                                             | 33 |
| Sn@Graphene                                                                     | 730<br>[0.1 A/g]    | 60%   | 95% @ 100              | 106 @ 3.2   | hydrogen assisted<br>thermal reduction<br>method | 34 |
| Yolk-shell Sn <sub>4</sub> P <sub>3</sub> @C                                    | 1804<br>[0.1 A/g]   | 43%   | 65 % @ 50<br>cycles    | 421 @ 3     | Solvothermal                                     | 35 |
| Micro/nano SB-RP@MWCNT-KB                                                       | 2801<br>[0.86 A/g]  | 88%   | 96% @ 70<br>cycles     | 1779 @ 5.2  | HEBM                                             | 36 |
| Sb porous Microspheres                                                          | 981.7               | 64.6% | 97.2% @ 100            | 312.9 @ 3.2 | Templates method                                 | 37 |

|  |           |  |        |  |  |  |
|--|-----------|--|--------|--|--|--|
|  | [0.1 A/g] |  | cycles |  |  |  |
|--|-----------|--|--------|--|--|--|

## References:

1. T. Jiang, R. Zhang, Q. Yin, W. Zhou, Z. Dong, N. A. Chernova, Q. Wang, F. Omenya and M. S. Whittingham, Morphology, composition and electrochemistry of a nano-porous silicon versus bulk silicon anode for lithium-ion batteries, *J. Mater. Sci.*, 2017, **52**, 3670–3677.
2. T. Mu, B. Shen, S. Lou, Z. Zhang, Y. Ren, X. Zhou, P. Zuo, C. Du, Y. Ma, H. Huo and G. Yin, Scalable mesoporous silicon microparticles composed of interconnected nanoplates for superior lithium storage, *Chem. Eng. J.*, 2019, **375**, 121923.
3. W. He, H. Tian, F. Xin and W. Han, Scalable fabrication of micro-sized bulk porous Si from Fe–Si alloy as a high performance anode for lithium-ion batteries, *J. Mater. Chem. A*, 2015, **3**, 17956–17962.
4. J. S. Kim, M. Halim, D. Byun and J. K. Lee, Amorphous carbon-coated prickle-like silicon of micro and nano hybrid anode materials for lithium-ion batteries, *Solid State Ionics*, 2014, **260**, 36–42.
5. R. Yi, J. Zai, F. Dai, M. L. Gordin and D. Wang, Dual conductive network-enabled graphene/Si–C composite anode with high areal capacity for lithium-ion batteries, *Nano Energy*, 2014, **6**, 211–218.
6. R. Amine, A. Daali, X. Zhou, X. Liu, Y. Liu, Y. Ren, X. Zhang, L. Zhu, S. Al-Hallaj, Z. Chen, G.-L. Xu and K. Amine, A practical phosphorus-based anode material for high-energy lithium-ion batteries, *Nano Energy*, 2020, **74**, 104849.
7. S. Haghghat-Shishavan, M. Nazarian-Samani, M. Nazarian-Samani, H.-K. Roh, K.-Y. Chung, B.-W. Cho, S. F. Kashani-Bozorg and K.-B. Kim, Strong, persistent superficial oxidation-assisted chemical bonding of black phosphorus with multiwall carbon nanotubes for high-capacity ultradurable storage of lithium and sodium, *J. Mater. Chem. A*, 2018, **6**, 10121–10134.
8. D. Yuan, J. Cheng, G. Qu, X. Li, W. Ni, B. Wang and H. Liu, Amorphous red phosphorous embedded in carbon nanotubes scaffold as promising anode materials for lithium-ion batteries, *J. Power Sources*, 2016, **301**, 131–137.
9. Z. Yu, J. Song, M. L. Gordin, R. Yi, D. Tang and D. Wang, Phosphorus-Graphene Nanosheet Hybrids as Lithium-Ion Anode with Exceptional High-Temperature Cycling Stability, *Adv. Sci.*, 2015, **2**, 1400020.
10. L. Liu, X. Gao, X. Cui, B. Wang, F. Hu, T. Yuan, J. Li, L. Zu, H. Lian and X. Cui, Chemical Vapor Transport Synthesis of Fibrous Red Phosphorus Crystal as Anodes for Lithium-Ion Batteries, *Nanomater.*, 2023, **13**, 1060.
11. Y. Xu, Q. Liu, Y. Zhu, Y. Liu, A. Langrock, M. R. Zachariah and C. Wang, Uniform Nano-Sn/C Composite Anodes for Lithium Ion Batteries, *Nano Lett.*, 2013, **13**, 470–474.
12. W. Ni, Y. Wang and R. Xu, Formation of Sn@C Yolk–Shell Nanospheres and Core–Sheath Nanowires for Highly Reversible Lithium Storage, *Part. Part. Syst. Charact.*, 2013, **30**, 873–880.
13. T. Song, M. Yan and M. Qian, A dealloying approach to synthesizing micro-sized porous tin (Sn) from immiscible alloy systems for potential lithium-ion battery anode applications, *J. Porous Mater.*, 2015, **22**, 713–719.
14. L. Sun, T. Ma, J. Zhang, X. Guo, C. Yan and X. Liu, Double-shelled hollow carbon spheres confining tin as high-performance electrodes for lithium ion batteries, *Electrochim. Acta*, 2019, **321**, 134672.

15. J. Qin, C. He, N. Zhao, Z. Wang, C. Shi, E.-Z. Liu and J. Li, Graphene Networks Anchored with Sn@Graphene as Lithium Ion Battery Anode, *ACS Nano*, 2014, **8**, 1728–1738.
16. A. Daali, X. Zhou, C. Zhao, I. Hwang, Z. Yang, Y. Liu, R. Amine, C.-J. Sun, W. Otieno, G.-L. Xu and K. Amine, In situ microscopy and spectroscopy characterization of microsized Sn anode for sodium-ion batteries, *Nano Energy*, 2023, **115**, 108753.
17. H. Shen, Y. Huang, R. Hao, Y. Chang, Z. Ma, B. Guo, P. Wang, H. Yang, J. Cheng, Q. Li, H. Wang, Z. Liu and A. Nie, Mechanical robustness two-dimensional silicon phosphide flake anodes for lithium ion batteries, *ACS Sustain. Chem. Eng.*, 2020, **8**,.
18. L.-J. Xue, Y.-F. Xu, L. Huang, F.-S. Ke, Y. He, Y.-X. Wang, G.-Z. Wei, J.-T. Li and S.-G. Sun, Lithium storage performance and interfacial processes of three dimensional porous Sn–Co alloy electrodes for lithium-ion batteries, *Electrochim. Acta*, 2011, **56**, 5979–5987.
19. H.-. T. Kwon, C. K. Lee, K.-. J. Jeon and C.-. M. Park, Silicon diphosphide: a Si-based three-dimensional crystalline framework as a high-performance Li-ion battery anode, *ACS Nano*, 2016, **10**,.
20. S. Fan, L. Y. Lim, Y. Y. Tay, S. S. Pramana, X. Rui, M. K. Samani, Q. Yan, B. K. Tay, M. F. Toney and H. H. Hng, Rapid fabrication of a novel Sn–Ge alloy: structure–property relationship and its enhanced lithium storage properties, *J. Mater. Chem. A*, 2013, **1**, 14577–14585.
21. Y. Xu, E. Swaans, S. Basak, H. Zandbergen, D. Borsa and F. Mulder, Reversible Na-Ion Uptake in Si Nanoparticles, *Adv. Energy Mater.*, 2015, **6**, 1501436.
22. Q. Zhao, Y. Huang and X. Hu, A Si/C nanocomposite anode by ball milling for highly reversible sodium storage, *Electrochem. Commun.*, 2016, **70**, 8–12.
23. C.-H. Lim, T.-Y. Huang, P.-S. Shao, J.-H. Chien, Y.-T. Weng, H.-F. Huang, B. J. Hwang and N.-L. Wu, Experimental Study on Sodiation of Amorphous Silicon for Use as Sodium-Ion Battery Anode, *Electrochim. Acta*, 2016, **211**, 265–272.
24. L. Zhang, X. Hu, C. Chen, H. Guo, X. Liu, G. Xu, H. Zhong, S. Cheng, P. Wu, J. Meng, Y. Huang, S. Dou and H. Liu, In Operando Mechanism Analysis on Nanocrystalline Silicon Anode Material for Reversible and Ultrafast Sodium Storage, *Adv. Mater.*, 2017, **29**, 1604708.
25. Y. Li, F. Wu, Y. Li, X. Feng, L. Zheng, M. Liu, S. Li, J. Qian, Z. Wang, H. Ren, Y. Gong, C. Wu and Y. Bai, Multilevel Gradient-Ordered Silicon Anode with Unprecedented Sodium Storage, *Adv. Mater.*, **2024**, 2310270.
26. G.-L. Xu, Z. Chen, G.-M. Zhong, Y. Liu, Y. Yang, T. Ma, Y. Ren, X. Zuo, X.-H. Wu, X. Zhang and K. Amine, Nanostructured Black Phosphorus/Ketjenblack–Multiwalled Carbon Nanotubes Composite as High Performance Anode Material for Sodium-Ion Batteries, *Nano Lett.*, 2016, **16**, 3955–3965.
27. Y. Zhu, Y. Wen, X. Fan, T. Gao, F. Han, C. Luo, S.-C. Liou and C. Wang, Red Phosphorus–Single-Walled Carbon Nanotube Composite as a Superior Anode for Sodium Ion Batteries, *ACS Nano*, 2015, **9**, 3254–3264.
28. M. Dahbi, N. Yabuuchi, M. Fukunishi, K. Kubota, K. Chihara, K. Tokiwa, X. Yu, H. Ushiyama, K. Yamashita, J.-Y. Son, Y.-T. Cui, H. Oji and S. Komaba, Black Phosphorus as a High-Capacity, High-Capability Negative Electrode for Sodium-Ion Batteries: Investigation of the Electrode/Electrolyte Interface, *Chem. Mater*, 2016, **28**, 1625–1635.
29. J. Sun, H.-W. Lee, M. Pasta, H. Yuan, G. Zheng, Y. Sun, Y. Li and Y. Cui, A phosphorene-graphene hybrid material as a high-capacity anode for sodium-ion batteries, *Nat. Nanotechnol.*, 2015, **10**, 980–985.

30. E. Detsi, X. Petrisans, Y. Yan, J. B. Cook, Z. Deng, Y.-L. Liang, B. Dunn and S. H. Tolbert, Tuning ligament shape in dealloyed nanoporous tin and the impact of nanoscale morphology on its applications in Na-ion alloy battery anodes, *Phys. Rev. Mater.*, 2018, **2**, 055404.
31. L. Wang, Y. Ni, K. Lei, H. Dong, S. Tian and F. Li, 3D Porous Tin Created by Tuning the Redox Potential Acts as an Advanced Electrode for Sodium-Ion Batteries, *ChemSusChem*, 2018, **11**, 3376–3381.
32. B. Zhang, G. Rousse, D. Foix, R. Dugas, D. A. D. Corte and J.-M. Tarascon, Microsized Sn as Advanced Anodes in Glyme-Based Electrolyte for Na-Ion Batteries, *Adv. Mater.*, 2016, **28**, 9824–9830.
33. J. Huang, X. Guo, X. Du, X. Lin, J.-Q. Huang, H. Tan, Y. Zhu and B. Zhang, Nanostructures of solid electrolyte interphases and their consequences for microsized Sn anodes in sodium ion batteries, *Energy Environ. Sci.*, 2019, **12**, 1550–1557.
34. B. Luo, T. Qiu, D. Ye, L. Wang and L. Zhi, Tin nanoparticles encapsulated in graphene backboned carbonaceous foams as high-performance anodes for lithium-ion and sodium-ion storage, *Nano Energy*, 2016, **22**, 232–240.
35. J. Liu, P. Kopold, C. Wu, P. A. van Aken, J. Maier and Y. Yu, Uniform yolk–shell Sn<sub>4</sub>P<sub>3</sub>@C nanospheres as high-capacity and cycle-stable anode materials for sodium-ion batteries, *Energy Environ. Sci.*, 2015, **8**, 3531–3538.
36. X. Liu, B. Xiao, A. Daali, X. Zhou, Z. Yu, X. Li, Y. Liu, L. Yin, Z. Yang, C. Zhao, L. Zhu, Y. Ren, L. Cheng, S. Ahmed, Z. Chen, X. Li, G.-L. Xu and K. Amine, Stress- and Interface-Compatible Red Phosphorus Anode for High-Energy and Durable Sodium-Ion Batteries, *ACS Energy Lett.*, 2021, **6**, 547–556.
37. H. Hou, M. Jing, Y. Yang, Y. Zhang, Y. Zhu, W. Song, X. Yang and X. Ji, Sb porous hollow microspheres as advanced anode materials for sodium-ion batteries, *J. Mater. Chem. A*, 2015, **3**, 2971–2977.
